# Supplementary material for: A novel platelet risk score for stratifing the tumor immunophenotypes, treatment responses and prognosis in bladder carcinoma: results from real-world cohorts
Source: Front Pharmacol. 2023 May 4;14:1187700. doi: 10.3389/fphar.2023.1187700 (PMC10192868; doi:10.3389/fphar.2023.1187700)
Supplement: Supplementary file 8 [file Table1.XLSX]

## Sheet: Sheet1
Summary of 244 platelet related genes
A1BG
ACTN1
AKAP1
APOA1
BEX3
CAPZA2
CD9
CHID1
CTSA
DAPP1
DGKK
DOCK4
EHD1
F2RL2
FGB
GATA2
GNA13
GNAT3
GNG12
GNGT1
GTPBP2
H3C12
H3C7
HBG2
IFNA10
IFNA5
IRF2
ITPR1
KIF13B
KIF1C
KIF26A
KIF3C
KIFC1
LAT
LYN
MAPK14
MLH3
NAP1L1
P2RY1
PDPN
PIK3CA
PIP4K2A
PRDX6
PRKCA
PROS1
PTPN6
RACGAP1
RARRES2
RHOG
SELP
SH2B2
SPARC
SYTL4
TGFB3
TMX3
TSC22D1
TUBA4A
TUBB4A
VCL
WDR1
A2M
ABHD6
ABL1
AHSG
APBB1IP
ACTB
AK3
APLP2
BCAR1
CAPZA1
CD63
CFL1
CSK
DAGLB
DGKI
DOCK3
EGF
F2R
FGA
GATA1
GNA12
GNAS
GNG11
GNG8
GRB2
H3C11
H3C6
HBG1
IFNA1
IFNA4
IRF1
ITPK1
KIF12
KIF1B
KIF25
KIF3B
KIFAP3
LAMP2
LY6G6F
MAPK1
MICAL1
MYLK
ORM2
PDPK1
PHF21A
PIK3R6
PPM1A
PRKAR2B
PRKCZ
PTPN12
RAC2
RAPGEF4
RHOB
SELENOP
SH2B1
SOS1
SYK
TGFB2
TMSB4X
TRPC7
TUBA3E
TUBB3
VAV3
VWF
ZNF185
ACTN4
AKT1
APOOL
CABLES1
CARMIL1
CDC42
CLEC3B
CTTN
DGKB
DGKZ
DOCK6
EHD3
F5
FHL1
GATA4
GNA15
GNB2
GNG2
GP1BA
H2BC21
H3C14
HABP4
HDAC2
IFNA14
IFNA7
ITGA2B
ITPR3
KIF16B
KIF20B
KIF27
KIF4B
KLC1
LCP2
MAFG
MAX
MMRN1
NHLRC2
PCDH7
PF4
PIK3CG
PLCG2
PRKACB
PRKCD
PSAP
RAB27B
RAD51C
RASGRP2
RSU1
SERPINA3
SHC1
SRC
TAX1BP3
THPO
TOR4A
TUBA1A
TUBA8
TUBB6
VEGFB
WIPF1
ABCC4
ADRA2A
ALB
APP
CABLES2
CBX5
CDK2
CLU
CXCL5
DGKD
DOCK1
DOCK7
EIF2AK1
F8
FLNA
GATA5
GNAI1
GNB3
GNG3
GP1BB
H3-3A
H3C15
HBA1
HGF
IFNA16
IFNA8
ITGB3
JAK2
KIF18A
KIF21A
KIF2A
KIF5A
KLC2
LEFTY2
MAFK
MFAP3L
MPIG6B
NRGN
PCYOX1L
PF4V1
PIK3R1
PLEK
PRKACG
PRKCE
PTGS1
RAB31
RAF1
RBSN
RUFY1
SERPINA4
SIN3A
SRGN
TBXA2R
TIMP1
TP53
TUBA1B
TUBAL3
TUBB8
VEGFC
YPEL5
